# Supplementary material for: Efficacy of a Plant-Microbe System: Pisum sativum (L.) Cadmium-Tolerant Mutant and Rhizobium leguminosarum Strains, Expressing Pea Metallothionein Genes PsMT1 and PsMT2, for Cadmium Phytoremediation
Source: Front Microbiol. 2020 Jan 29;11:15. doi: 10.3389/fmicb.2020.00015 (PMC7000653; doi:10.3389/fmicb.2020.00015)

Supplementary Material

Efficacy of a Plant-Microbe System: *Pisum sativum* (L.) Cadmium-Tolerant Mutant and *Rhizobium leguminosarum* Strains, Expressing Pea Metallothionein Genes *PsMT1* and *PsMT2*, for Cadmium Phytoremediation

Viktor E. Tsyganov1,2*, Anna V. Tsyganova1, Artemii P. Gorshkov1, Elena V. Seliverstova1,3, Viktoria E. Kim1, Elena P. Chizhevskaya1, Andrey A. Belimov1, Tatiana A. Serova1, Kira A. Ivanova1, Olga A. Kulaeva1, Pyotr G. Kusakin1, Anna B. Kitaeva1, Igor A. Tikhonovich1,4

1All-Russia Research Institute for Agricultural Microbiology, Pushkin 8, Saint-Petersburg, Russia

2Saint Petersburg Scientific Center RAS, Universitetskaya embankment 5, 199034, Russia

3Sechenov Institute of Evolutionary Physiology and Biochemistry of the Russian Academy of Sciences, Toreza prospect 44, Saint Petersburg, 194223, Russia

4Saint Petersburg State University, Department of Genetics and Biotechnology, Saint Petersburg, Russia

*** Correspondence:**Viktor E. Tsyganov
tsyganov@arriam.spb.ru

Supplemental Table 1. Primers used in this study.

| **Primer name** | **Sequence (5’–3’)** |
| --- | --- |
| MT1-F | ATGTCTGGATGTGGTTGTGGA |
| MT1-R | GCCTCCAATATCTCTGCTTCA |
| MT2-F | ATGTCTTGCTGTGGTGGAAACT |
| MT2-R | ATCCTGCCACTAAACGGGG |
| nifH-F | GGATCCCGTCGTTGCCTGCTG |
| nifH-R | GTTTGGCGTTCCTTCATGTGTTC |
| PsMT-1F | ATGTCTGGATGTGGTTGTGGAAG |
| PsMT-1R | TCATTTGCAGTTGCAAGGGTCA |
| PsMT-2F | TGGAAACTGTGGTTGCGGTACTAG |
| PsMT-2R | TCCACATTTGCAGCCATCATTCTC |

Supplemental Table 2. Content of nutrient elements in shoots of pea genotypes SGE and SGECdt grown in nutrient solution and inoculated with *R. leguminosarum* bv. *viciae* strains 3841, 3841-PsMT1 or 3841-PsMT2, respectively.

| Treatments | B,  ng g-1 DW | Ca,  mg g-1 DW | Co,  µg g-1 DW | Cu,  µg g-1 DW | Fe,  µg g-1 DW | K,  mg g-1 DW | Mg,  mg g-1 DW | Mn,  µg g-1 DW | Mo,  µg g-1 DW | N,  mg g-1 DW | Na,  µg g-1 DW | Ni,  µg g-1 DW | P,  mg g-1 DW | Zn,  µg g-1 DW |
| --- | --- | --- | --- | --- | --- | --- | --- | --- | --- | --- | --- | --- | --- | --- |
|  | **Untreated plants** | | | | | | | | | | | | | |
| SGE + 3841 | 28 ± 0.8cd | 8,0 ± 0.2abc | 4,4 ± 0.1ab | 84 ± 2d | 73 ± 8cd | 30 ± 0.2cd | 5,1 ± 0.1a | 64 ± 1a | 46 ± 2b | 18.1 ± 0.6abc | 288 ± 12d | 3,6 ± 0.1c | 70 ± 2c | 107 ± 4cd |
| SGECdt + 3841 | 27 ± 0.8cd | 8,6 ± 0.2c | 4,4 ± 0.1ab | 73 ± 3bc | 68 ± 5bc | 30 ± 0.6cd | 5,1 ± 0.2a | 67 ± 3a | 37 ± 1a | 17.8 ± 0.5abc | 262 ± 20cd | 3,5 ± 0.1bc | 58 ± 3b | 102 ± 2c |
| SGE + 3841-PsMT1 | 26 ± 0.8bc | 8,3 ± 0.2bc | 4,4 ± 0.1ab | 72 ± 2ab | 72 ± 5cd | 28 ± 0.7b | 5,2 ± 0.1a | 66 ± 2a | 32 ± 2a | 17.4 ± 0.7ab | 248 ± 12bcd | 3,4 ± 0.1bc | 59 ± 2b | 86 ± 3bc |
| SGECdt + 3841-PsMT1 | 26 ± 0.6bc | 8,4 ± 0.3bc | 4,2 ± 0.1ab | 72 ± 3ab | 69 ± 8c | 28 ± 0.9b | 5,0 ± 0.2a | 65 ± 2a | 38 ± 3a | 17.7 ± 0.9abc | 246 ± 19bcd | 3,2 ± 0.1bc | 58 ± 3b | 91 ± 3bc |
| SGE + 3841-PsMT2 | 33 ± 1.6e | 7,3 ± 0.4ab | 4,4 ± 0.1a | 79 ± 1bcd | 58 ± 4abc | 28 ± 0.3b | 5,4 ± 0.1ab | 68 ± 3ab | 36 ± 2a | 19.7 ± 0.7bc | 273 ± 7cd | 3,4 ± 0.1bc | 62 ± 1bc | 93 ± 3bc |
| SGECdt + 3841-PsMT2 | 36 ± 1.0e | 7,3 ± 0.4ab | 4,4 ± 0.2ab | 75 ± 2bc | 55 ± 7abc | 29 ± 0.6bc | 5,6 ± 0.3bc | 83 ± 3c | 37 ± 2a | 19.0 ± 1.4bc | 294 ± 32d | 3,4 ± 0.3bc | 59 ± 3b | 96 ± 2bc |
|  | **Plants treated with 0.5 µM CdCl2** | | | | | | | | | | | | | |
| SGE + 3841 | 27 ± 1.7bcd | 7,5 ± 0.5ab | 4,5 ± 0.1bc | 75 ± 2bcd | 86 ± 5d | 31 ± 0.5cd | 6,0 ± 0.2cd | 105 ± 4de | 36 ± 3a | 19.8 ± 0.4c | 252 ± 15bcd | 3,3 ± 0.1bc | 60 ± 2b | 106 ± 7cd |
| SGECdt + 3841 | 24 ± 1.3abc | 8,0 ± 0.5a | 4,1 ± 0.1ab | 70 ± 4ab | 58 ± 3abc | 27 ± 1.2ab | 5,6 ± 0.2bc | 101 ± 5de | 34 ± 3a | 19.9 ± 1.0c | 171 ± 15a | 2,7 ± 0.1ab | 56 ± 4ab | 97 ± 7c |
| SGE + 3841-PsMT1 | 18 ± 1.1a | 7,2 ± 0.5a | 4,3 ± 0.2ab | 65 ± 4ab | 56 ± 5abc | 28 ± 1.2b | 6,1 ± 0.3cd | 90 ± 6cd | 38 ± 3a | 18.6 ± 0.7bc | 198 ± 15ab | 2,8 ± 0.2ab | 51 ± 4ab | 73 ± 4a |
| SGECdt + 3841-PsMT1 | 23 ± 0.8b | 8,3 ± 0.5bc | 3,9 ± 0.2b | 64 ± 3a | 50 ± 3a | 25 ± 0.8a | 5,7 ± 0.3bcd | 98 ± 6de | 34 ± 4a | 16.2 ± 0.3a | 160 ± 12a | 2,5 ± 0.1a | 49 ± 3a | 73 ± 4a |
| SGE + 3841-PsMT2 | 24 ± 1.0b | 8,1 ± 0.5abc | 4,3 ± 0.1a | 72 ± 2b | 69 ± 5c | 32 ± 0.7d | 6,2 ± 0.2de | 106 ± 7e | 38 ± 1a | 17.9 ± 0.9abc | 155 ± 8a | 2,8 ± 0.1ab | 59 ± 2b | 89 ± 3bc |
| SGECdt + 3841-PsMT2 | 30 ± 1.1d | 7,6 ± 0.2ab | 5,0 ± 0.3c | 81 ± 5cd | 76 ± 6cd | 32 ± 0.8d | 6,7 ± 0.2e | 144 ± 7f | 47 ± 3b | 18.2 ± 0.7abc | 230 ± 38bc | 3,5 ± 0.3bc | 65 ± 5bc | 114 ± 4d |
|  | **Average for all inoculation treatments** | | | | | | | | | | | | | |
| Untreated SGE | 29 ± 1.0# | 7,9 ± 0.2* | 4,4 ± 0.1* | 78 ± 2# | 68 ± 4* | 29 ± 0.4* | 5,2 ± 0.1* | 66 ± 1* | 38 ± 2* | 18.4 ± 0.4* | 270 ± 7# | 3,5 ± 0.1# | 64 ± 2# | 95 ± 3* |
| Untreated SGECdt | 30 ± 1.2# | 8,1 ± 0.2* | 4,3 ± 0.1* | 73 ± 2*# | 64 ± 4* | 29 ± 0.5* | 5,3 ± 0.1* | 72 ± 3* | 37 ± 1* | 18.1 ± 0.6* | 267 ± 14# | 3,4 ± 0.1# | 58 ± 2*# | 96 ± 2* |
| Cd-treated SGE | 23 ± 1.2* | 7,6 ± 0.3* | 4,4 ± 0.1* | 71 ± 2* | 70 ± 4* | 30 ± 0.6* | 6,1 ± 0.1# | 101 ± 4# | 37 ± 1* | 18.8 ± 0.4* | 202 ± 13* | 3,0 ± 0.1* | 56 ± 2* | 89 ± 4* |
| Cd-treated SGECdt | 26 ± 1.0* | 8,0 ± 0.2* | 4,3 ± 0.2* | 72 ± 3* | 62 ± 4* | 28 ± 0.9* | 6,0 ± 0.2# | 114 ± 7@ | 38 ± 2* | 18.2 ± 0.6* | 187 ± 16* | 2,9 ± 0.2* | 57 ± 3* | 94 ± 5* |

Different letters show significant differences between treatments within sub columns for untreated and Cd-treated plants, whereas different symbols show significant differences between average values for all inoculation treatments (least significant difference test, *P* < 0.05, n = 5). De data are means ± SE. DW stands for dry weight.

**SUPPLEMENTAL FIGURE S1** Ultrastructural organization of untreated nodules of wild-type SGE inoculated with *R. leguminosarum* bv. *viciae* strain 3841. (**A**) An infected cell from the nitrogen fixation zone. (**B**) An infected cell from the infection zone. ba, bacteroid; cw, cell wall; v, vacuole; a, amyloplast; arrows indicate symbiosome membrane. Scale bar = 500 nm.


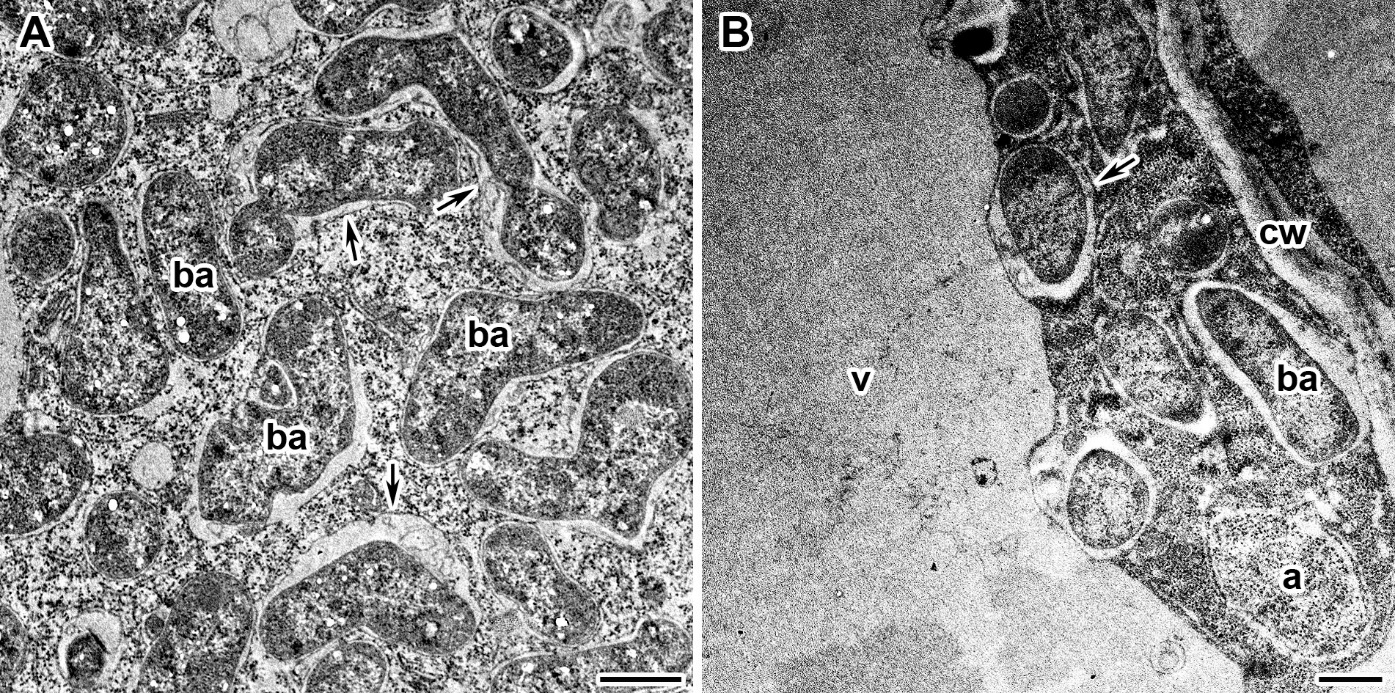


**SUPPLEMENTAL FIGURE S2** Accumulation of the electron dense crystals in vacuole in the cadmium treated nodules of wild-type SGE (**A,C,E**) and mutant SGECdt (**B,D,F**) inoculated with *R. leguminosarum* bv. *viciae* strain 3841 (**A,B**), 3841-MT1 (**C,D**) and 3841-MT2 (**E,F**). ba, bacteroid; b, bacterium; v, vacuole; triangles indicate electron dense crystals in vacuole. Scale bar = 500 nm.


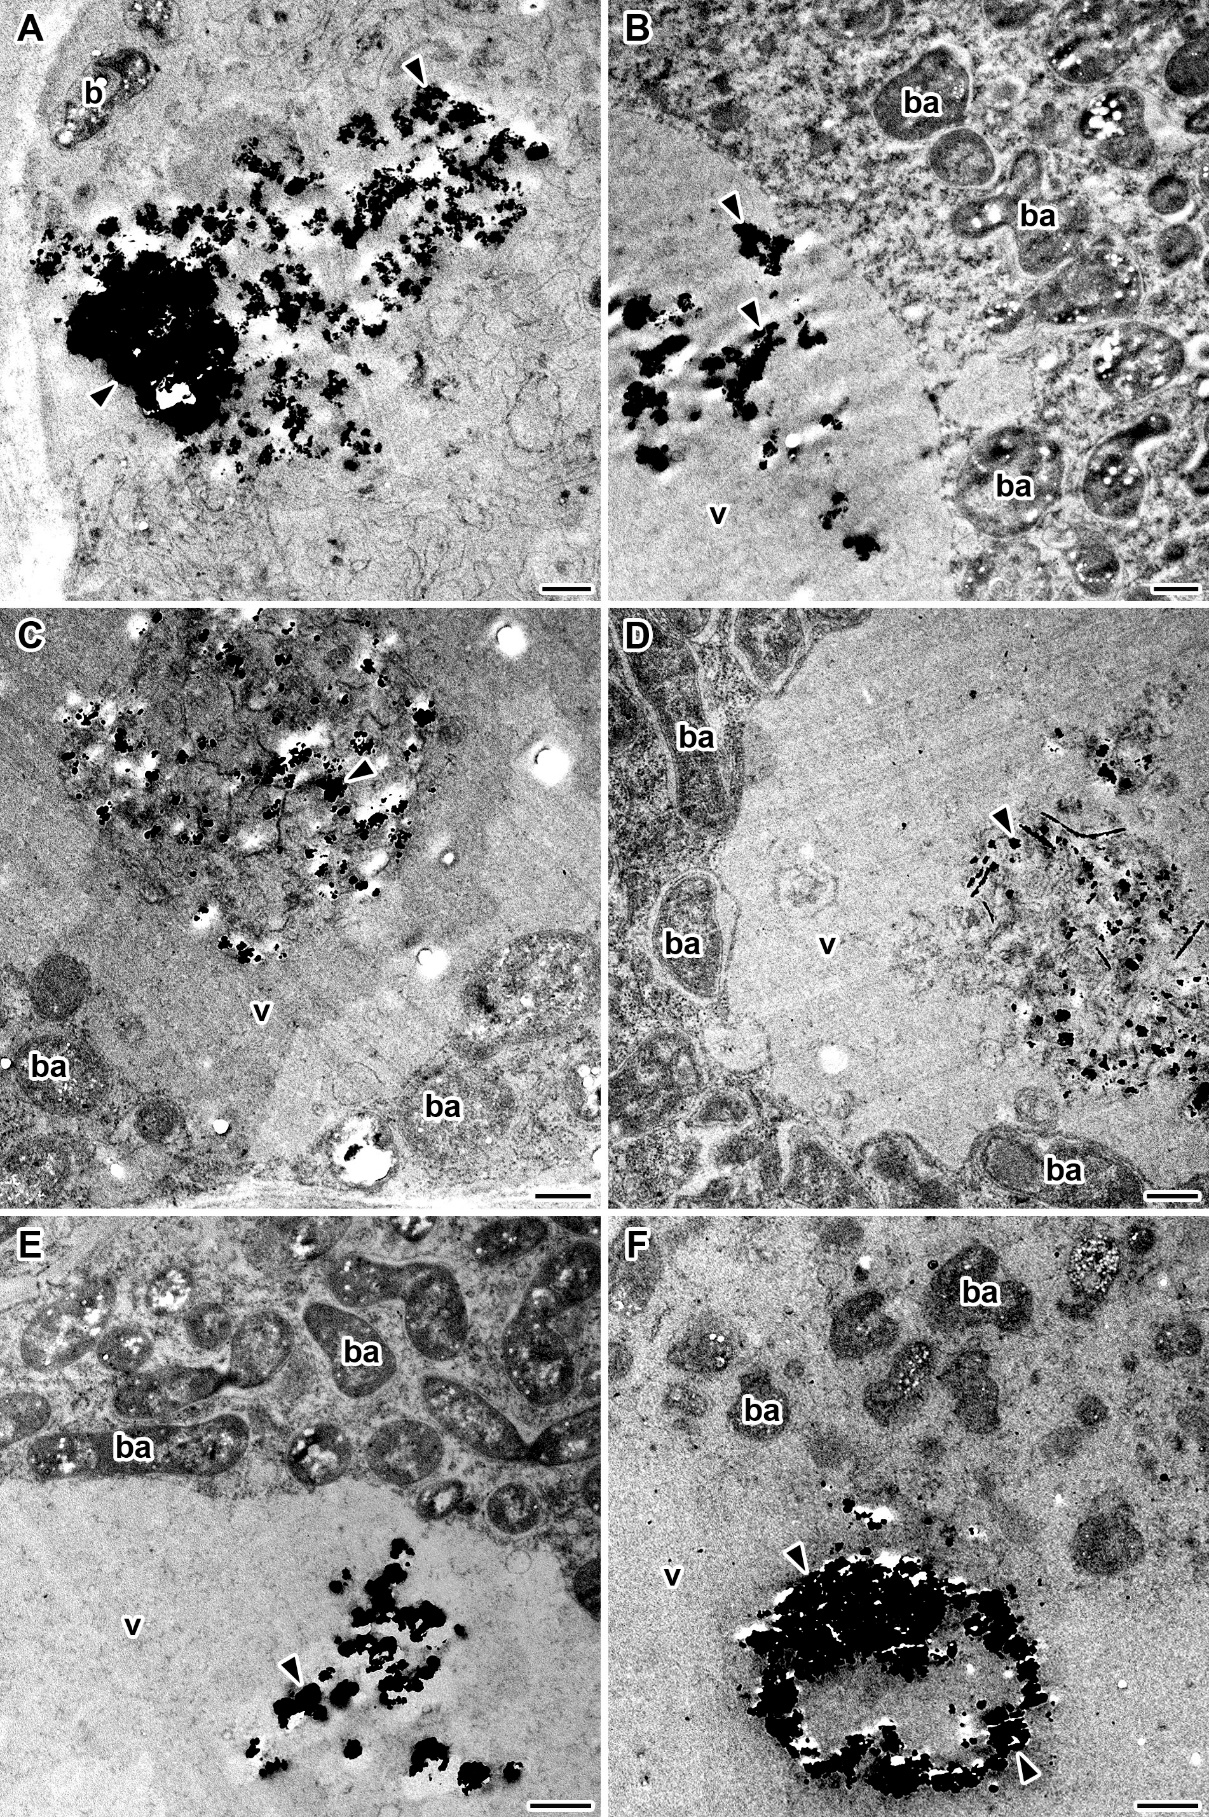

Supplement: Supplementary file 1 [file Data_Sheet_1.docx]
